# Supplementary material
Source: Springer Nature journal article supplement (https://www.springermedizin.de/resource/supplementary/13048_2010_62_MOESM1_ESM.pdf/9664854)

**A**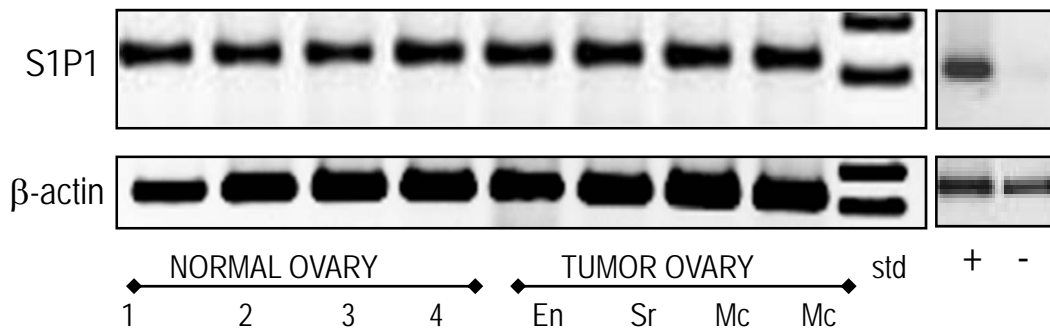**B**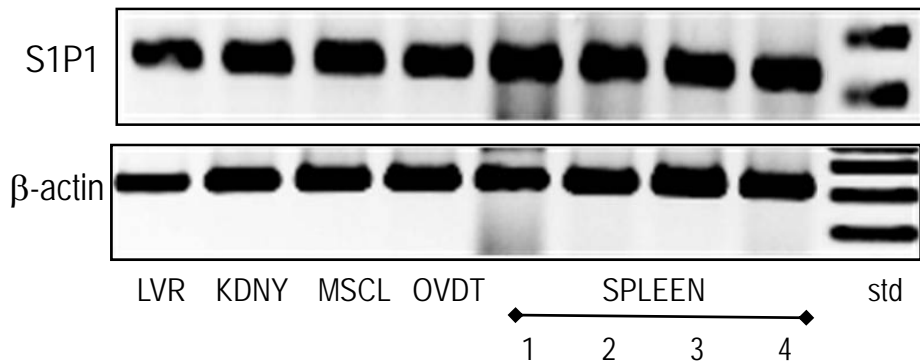

Supplement: MOESM1 [file 9664854]
